# Supplementary material for: Which endometrial preparation protocol provides better pregnancy and perinatal outcomes for endometriosis patients in frozen-thawed embryo transfer cycles? A retrospective study on 1413 patients
Source: Springer Nature journal article supplement (doi:10.1186/s13048-023-01095-4), 2023-01-09

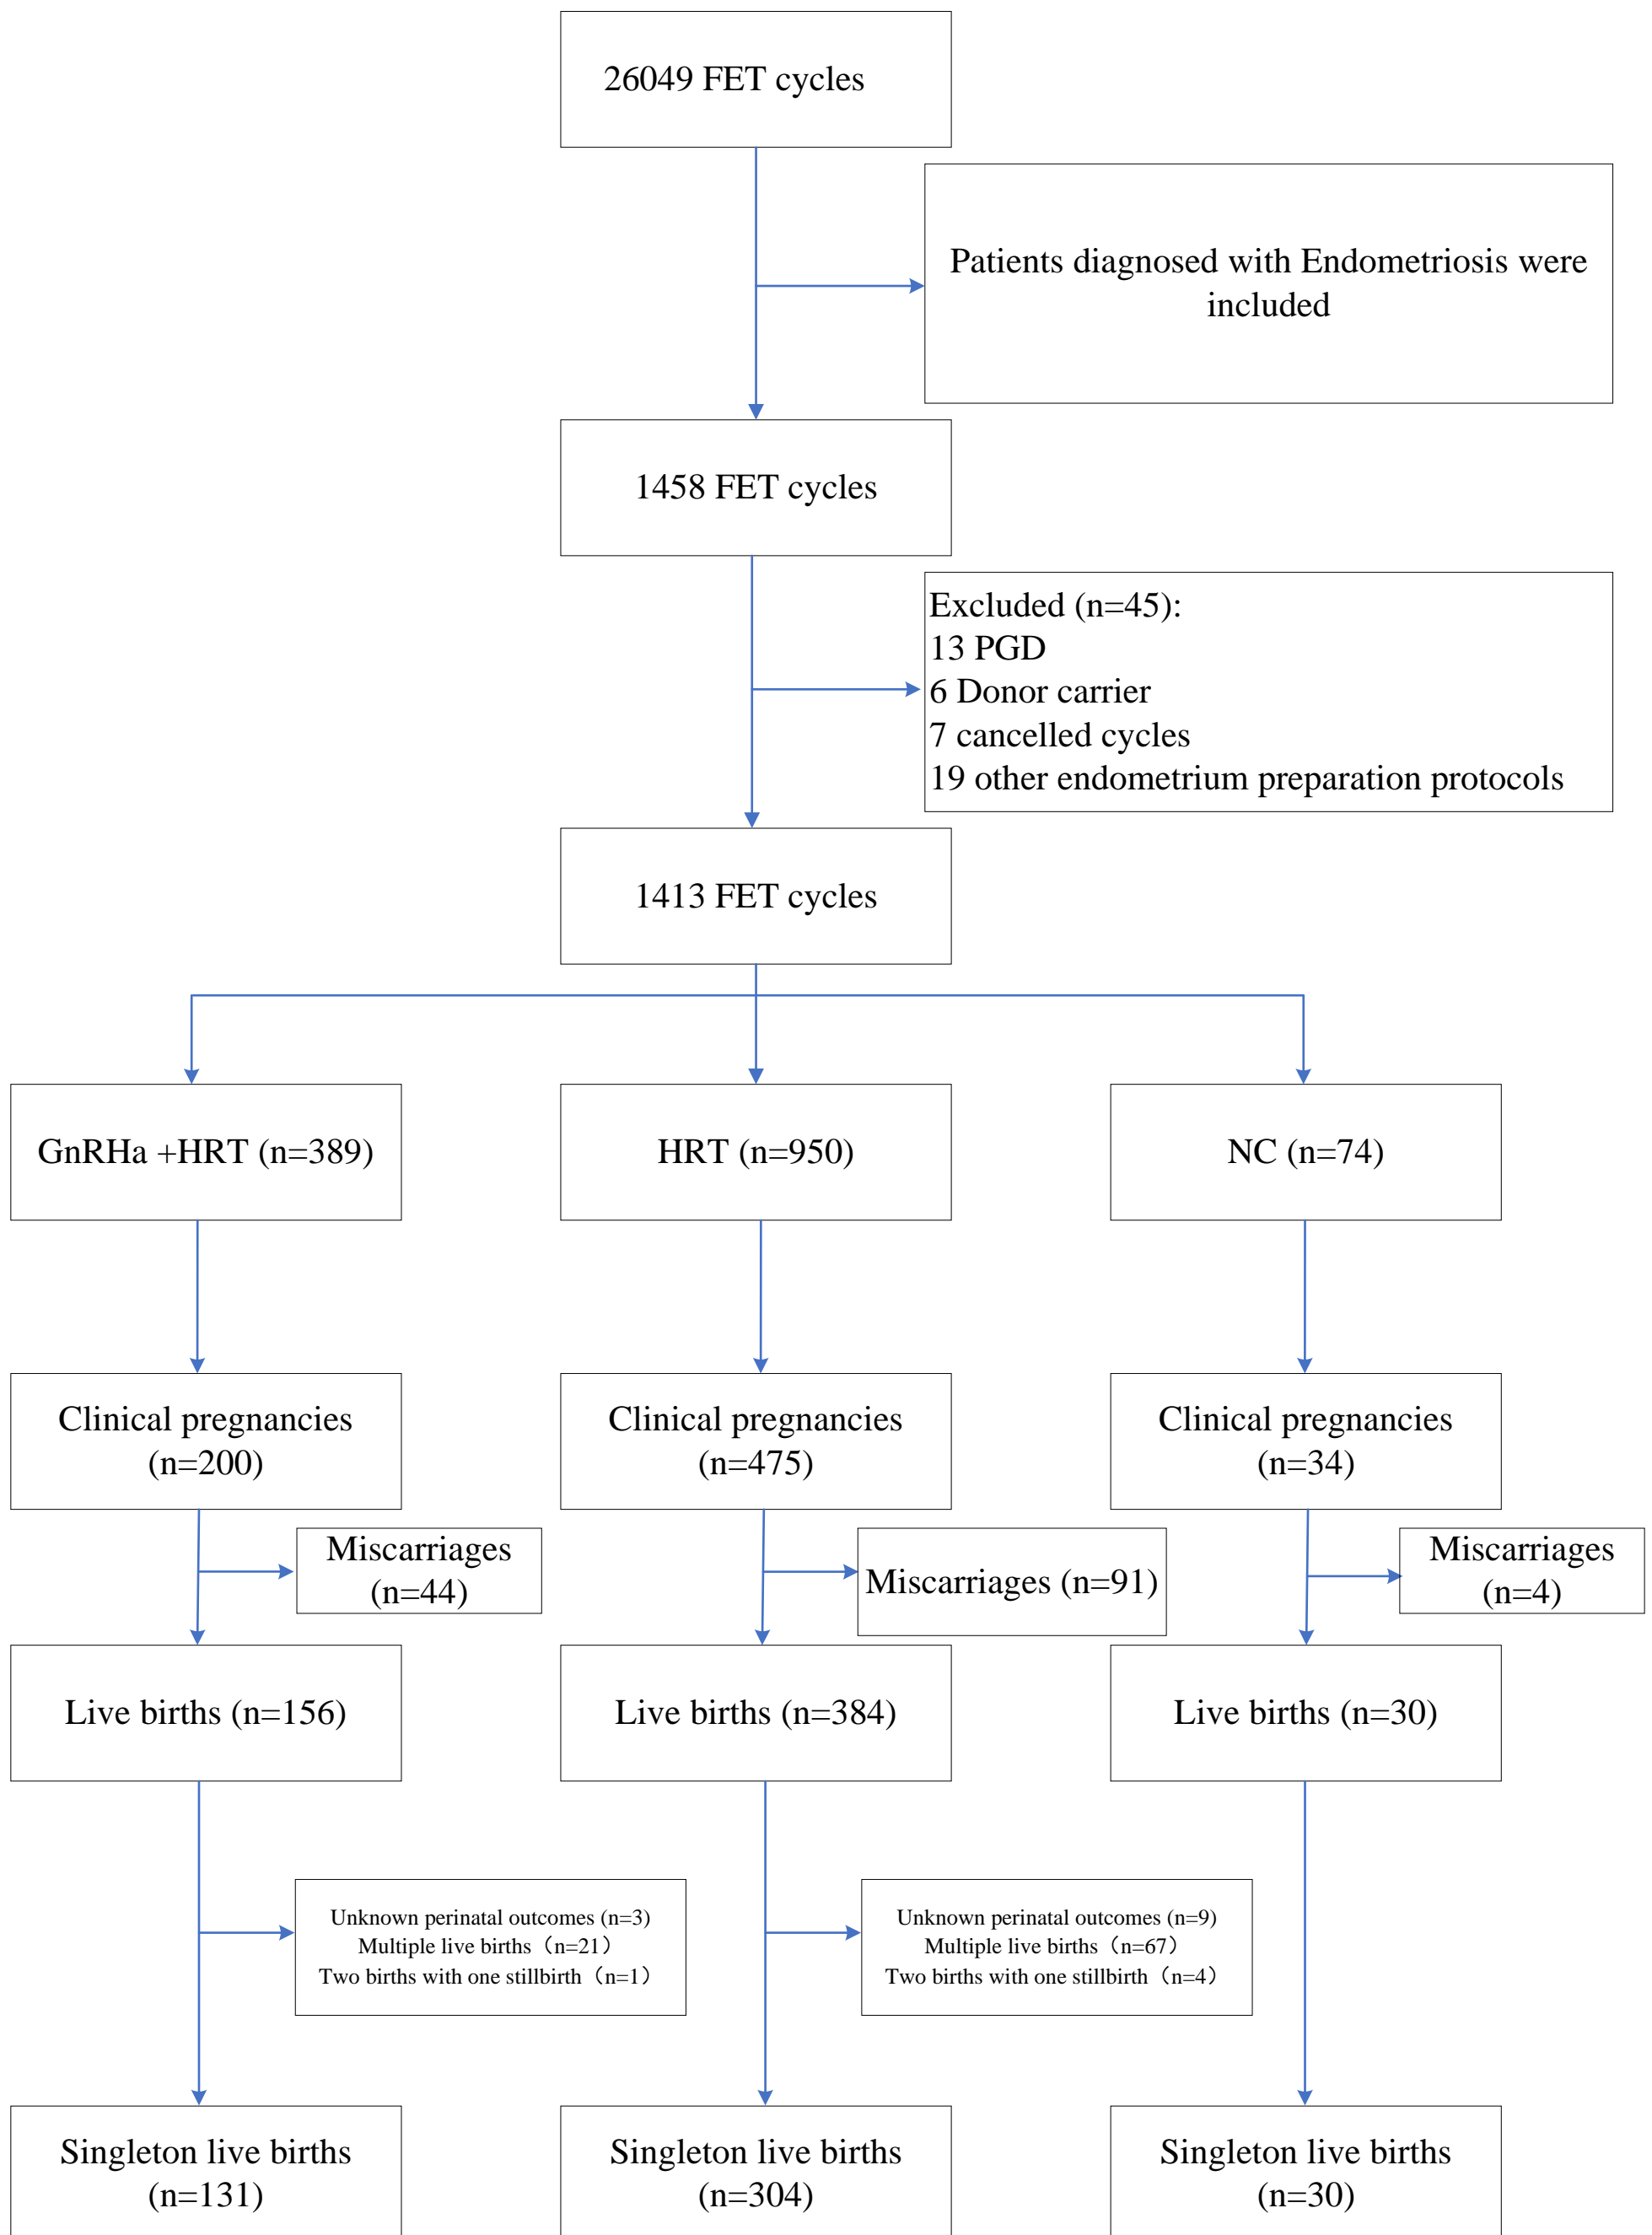

Supplement: MOESM1 [file 23903428]
